# Supplementary material for: A critical phantom study of the energy window used for 99mTc quantitative explorations with a ring CZT SPECT system
Source: Springer Nature journal article supplement (doi:10.1186/s40658-025-00793-w), 2025-08-20

Additional File 1. R20 for the various ROI in XL (top) and L (bottom)

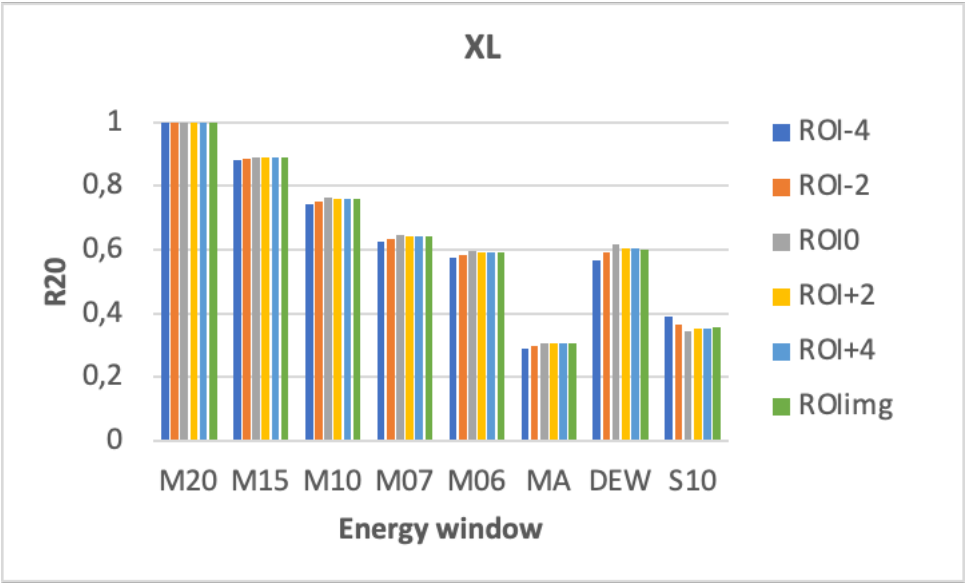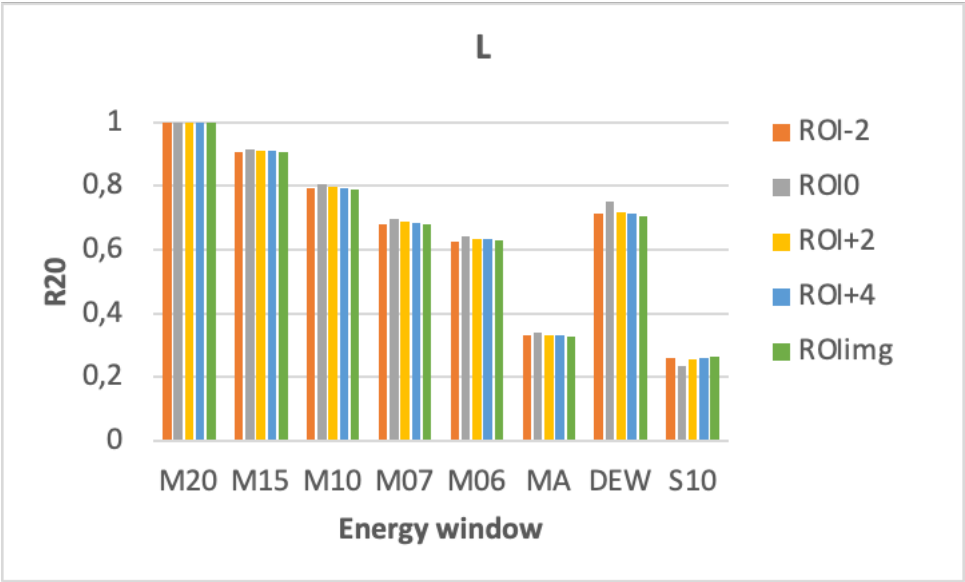

Additional File 2. Calibration factors obtained with XL (left) and L (right) phantoms for the various ROI drawn on the reconstructed images

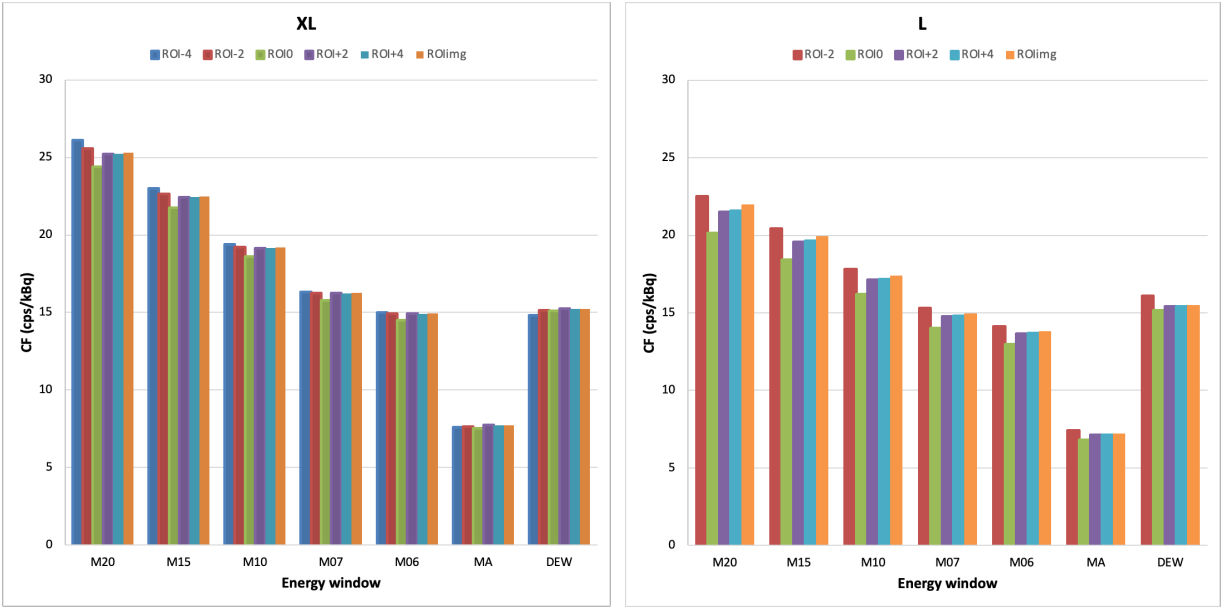

Supplement: MOESM1 [file 40658_2025_793_MOESM1_ESM.pdf]
